# Supplementary material
Source: PubMed Central journal article supplement (PMC528816)
Supplement: nar_32_19_e142__1.pdf [file nar_32_19_e142__1.pdf]

## **Supplementary material (for online-publication)**

### **Materials and Methods**

#### **Transfection of AP-1 decoy ODNs using other transfection reagents than Oligofectamine**

Approximately  $1.5 \times 10^5$  KB-3 cells/well were plated on sterile cover slips in 12-well plates one day before transfection. When 50-60% confluent, cells were transfected with 100 nM AP-1 ODNs using different reagents as indicated by each manufacturer's protocol. Thus, DNA was initially diluted in serum-free media. Then, the transfection reagent was mixed with DNA solution and incubated as following: Polyfect (Qiagen, Valencia, CA), 6  $\mu$ l, followed by 10 min incubation; Transfectin (Biorad, Hercules, CA), 5  $\mu$ l diluted in 100  $\mu$ l serum-free media followed by 20 min incubation; and Fugene 6 (Roche Applied Science), 1.5  $\mu$ l diluted in 50  $\mu$ l serum-free media followed by 15 min incubation. The DNA-transfection reagent complexes were added to KB-3 cells containing 250  $\mu$ l normal growth media (Polyfect), 300  $\mu$ l serum-free media (Transfectin) or 450  $\mu$ l serum-free media (Fugene). After 4 h, 500  $\mu$ l normal media was added or the media was replaced with fresh normal media for the cells transfected with Transfectin or Fugene, respectively. Each experiment included untransfected cells as a negative control. The slides for fluorescence microscopy were prepared as described in the Material and Methods section.

**Supplementary figure  
Fig. S1.**

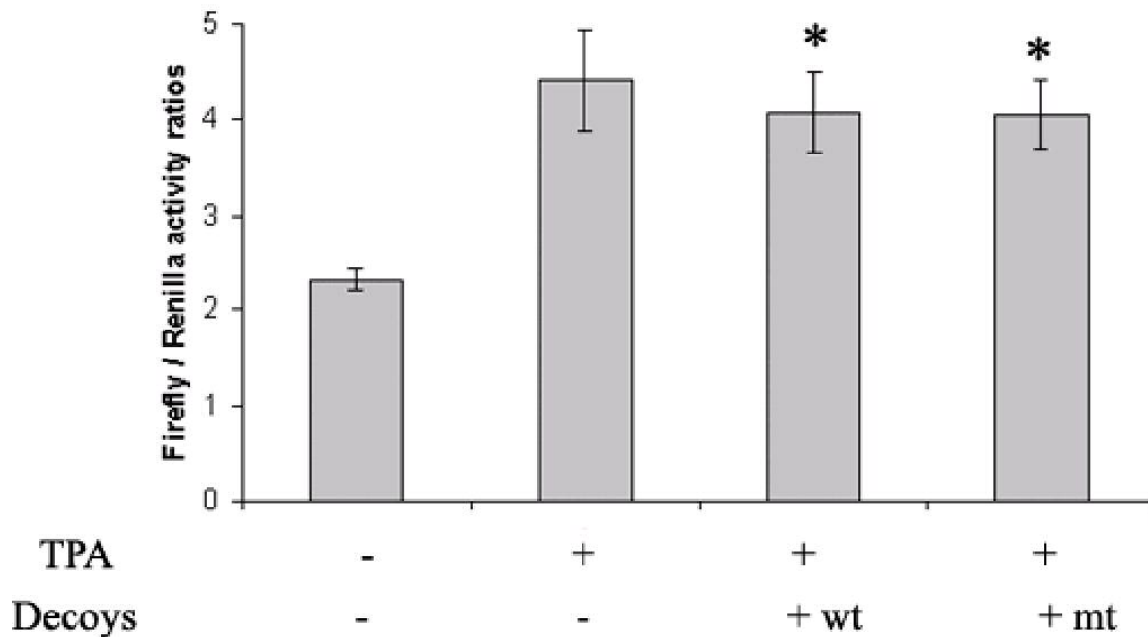

Fig.S1 Approximately 60% confluent KB-3 cells were cotransfected with pAP-1-Luc and pRL-TK plasmids in a 10:1 ratio using Lipofectamin Plus Reagent. After 24 h, the wild-type and mutated AP-1 ODN decoys were introduced into the cells following the protocol described in *Material and Methods*. To stimulate AP-1 activity, cells were treated with 12-*O*-tetradecanoylphorbol-13-acetate (TPA) for 16 h. To analyze luciferase expression cells were washed with PBS and lysed with 200  $\mu$ l of 1X Reporter Lysis Buffer (Promega, Madison, WI). The results are expressed as AP-1 Firefly luciferase activity/ Renilla luciferase activity ratios and represent the means of measurements from triplicate wells  $\pm$  SD from two independent experiments. There is no significant difference between wt or mt AP-1 decoy ODN-transfected cells, when compared with untransfected cells (\* p value > 0.5) after treatment with TPA; wt, wild-type; mt, mutated.
